# Supplementary material for: Effect of Surrounding Solvents on Interfacial Behavior of Gallium-Based Liquid Metal Droplets
Source: MDPI journal article supplement (doi:10.3390/ma15030706), 2022-01-18
Supplement: s1 [file s1]

---

Article

# Effect of Surrounding Solvents on Interfacial Behavior of Gallium-Based Liquid Metal Droplets

Ji-Hye Kim <sup>1,†</sup>, Ye-Jin Park <sup>2,†</sup>, Sooyoung Kim <sup>3</sup>, Ju-Hee So <sup>4,\*</sup> and Hyung-Jun Koo <sup>2,\*</sup>

<sup>1</sup> Department of New Energy Engineering, Seoul National University of Science and Technology, 232 Gongneung-ro, Nowon-gu, Seoul 01811, Korea; gh5289@naver.com

<sup>2</sup> Department of Chemical and Biomolecular Engineering, Seoul National University of Science and Technology, 232 Gongneung-ro, Nowon-gu, Seoul 01811, Korea

<sup>3</sup> Department of Chemical and Biomolecular Engineering, North Carolina State University, 27695 Raleigh, NC, USA

<sup>4</sup> Material and Component Convergence R&D Department, Korea Institute of Industrial Technology, Ansan 15588, Korea

\* Correspondence: jso@kitech.re.kr (J.-H.S.); hjkoo@seoultech.ac.kr (H.-J.K.)

† These authors contributed equally to this work.

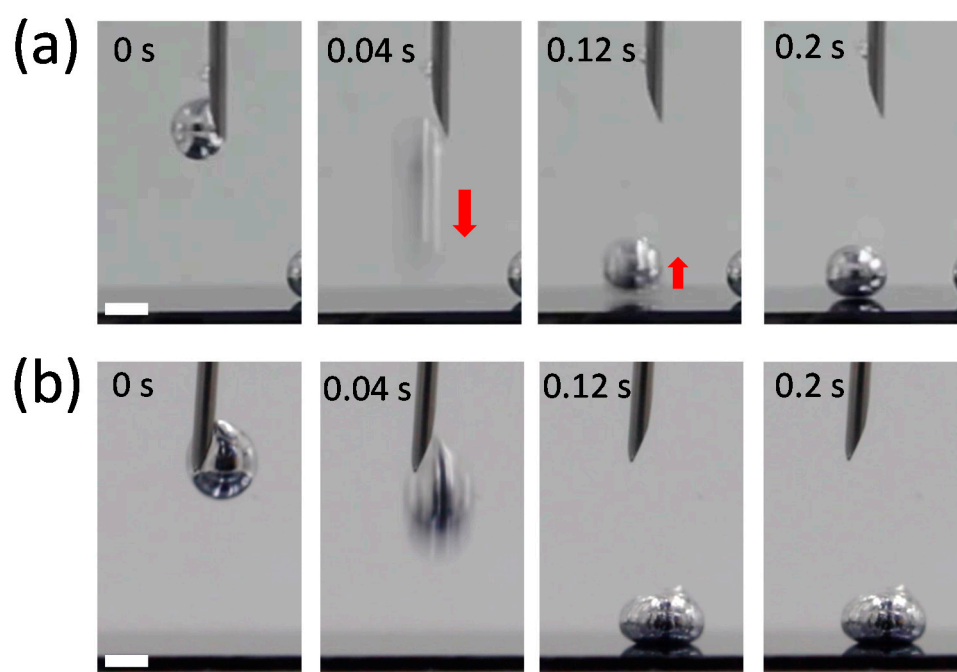

**Figure S1.** Video snapshots of a EGaIn droplet impacting on a Si wafer (a) in DMSO and (b) in ethanol. Scale bars are 2 mm. The red arrows indicate the movement of EGaIn droplets.

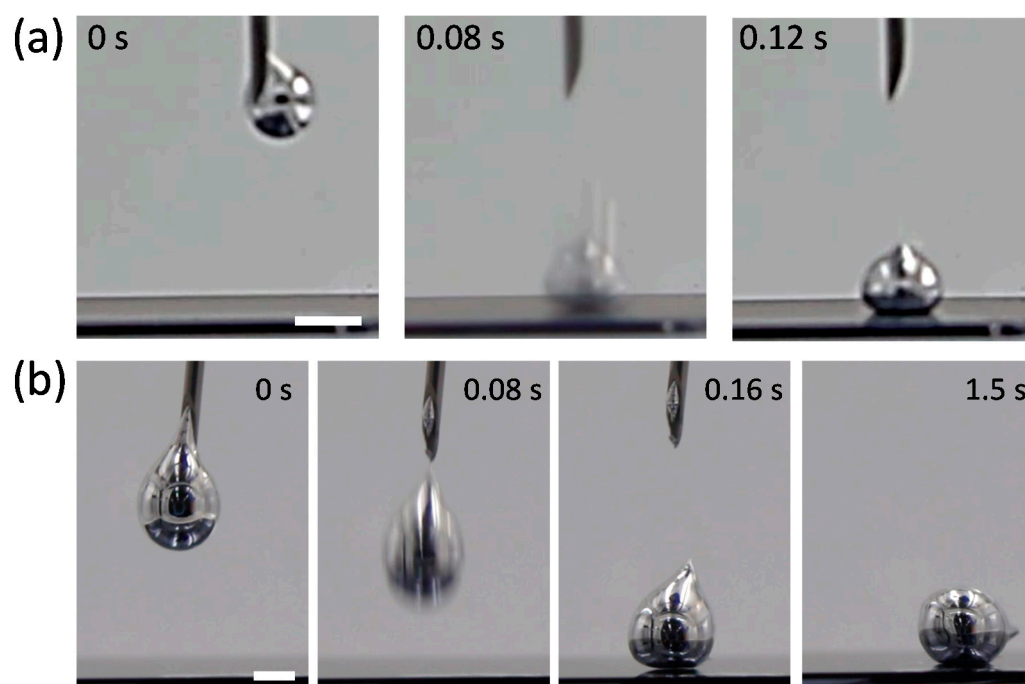

**Figure S2.** Video snapshots of a EGaIn droplet impacting on a Si wafer in (a) benzene and (b) silicone oil. Scale bars are 2 mm.

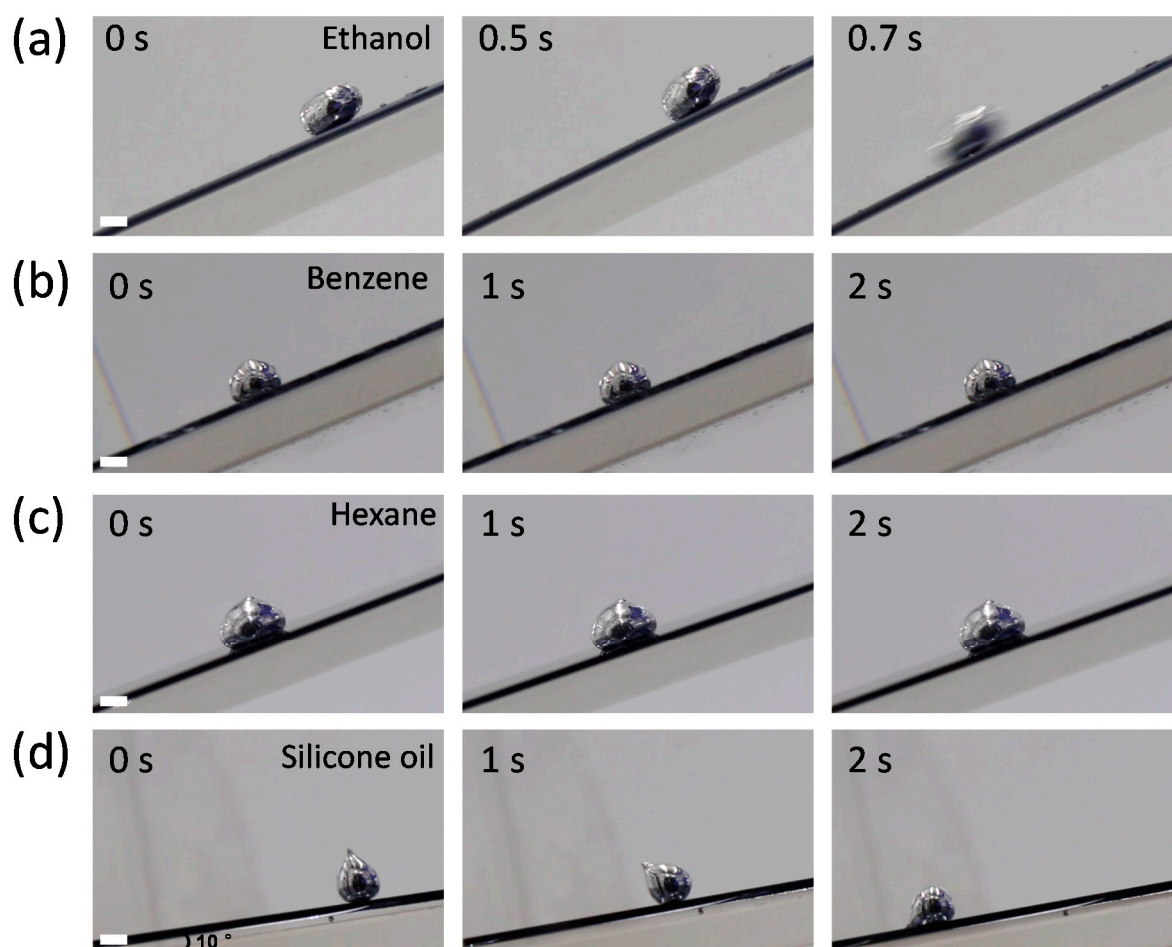

**Figure S3.** Video snapshots of EGaIn droplets when the wafer is tilted in (a) ethanol, (b) benzene, (c) hexane, and (d) silicone oil. Scale bars are 2 mm. The tilting angles are  $22 \pm 1^\circ$  in (a)-(c) and  $10^\circ$  in (d).

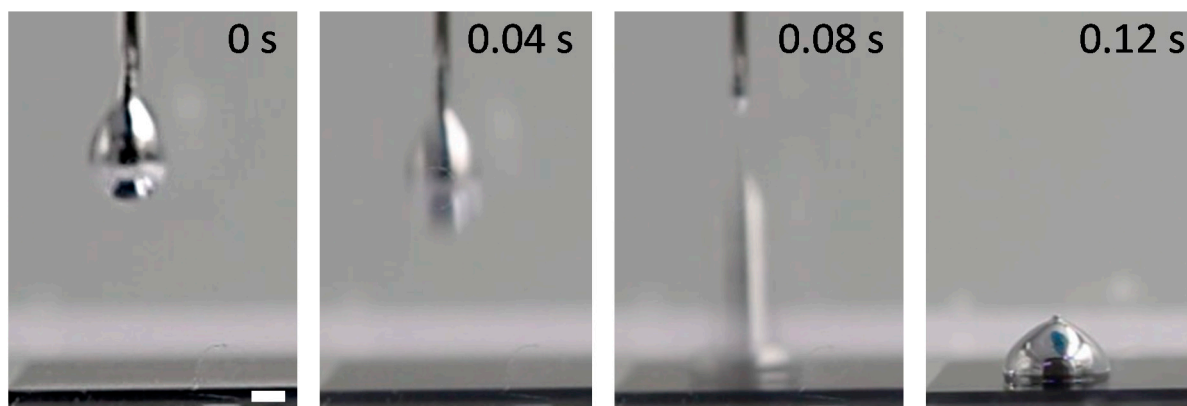

**Figure S4.** Video snapshots of a EGaIn droplet impacting on a Si wafer in the air. Scale bar is 2 mm.
